# Supplementary material
Source: PubMed Central journal article supplement (PMC6311509)

**Figure S1.** Purification of protoxins and activated toxins from Cry1Ab. Molecular masses are indicated in kDa. SDS-PAGE electrophoresis stained with Coomassie blue.

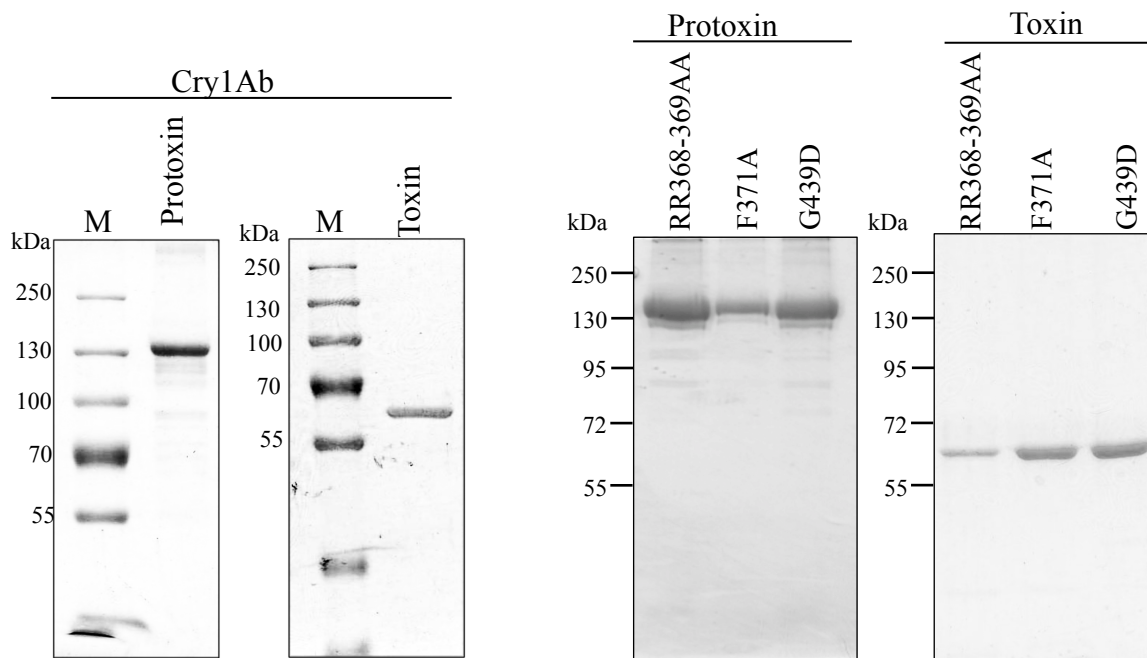

**Figure S2.** Western blot analysis of Cry1Ab protoxin, Cry1Ab activated toxin and C-terminal region using anti-Cry1Ab-toxin or anti-C-terminal antibodies

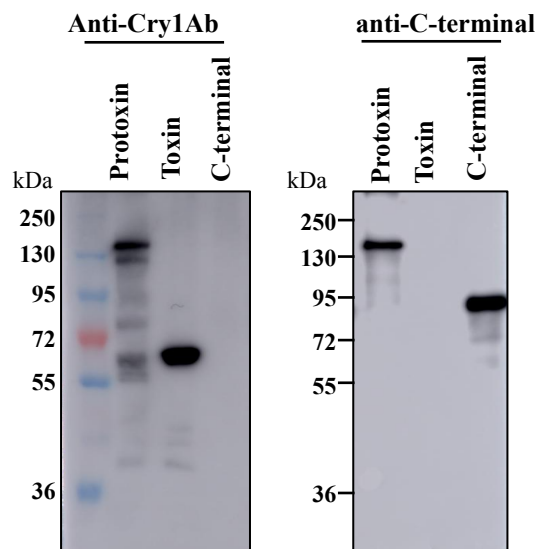

**Figure S3.** Purification of recombinant CAD (CR7-12 and CR12), ALP and APN expressed in *E. coli* cells. Molecular masses are indicated in kDa. Panel A, SDS-PAGE stained with Coomassie blue. Panel B, western blot analysis using anti-CAD, anti-APN and anti-ALP antibodies.

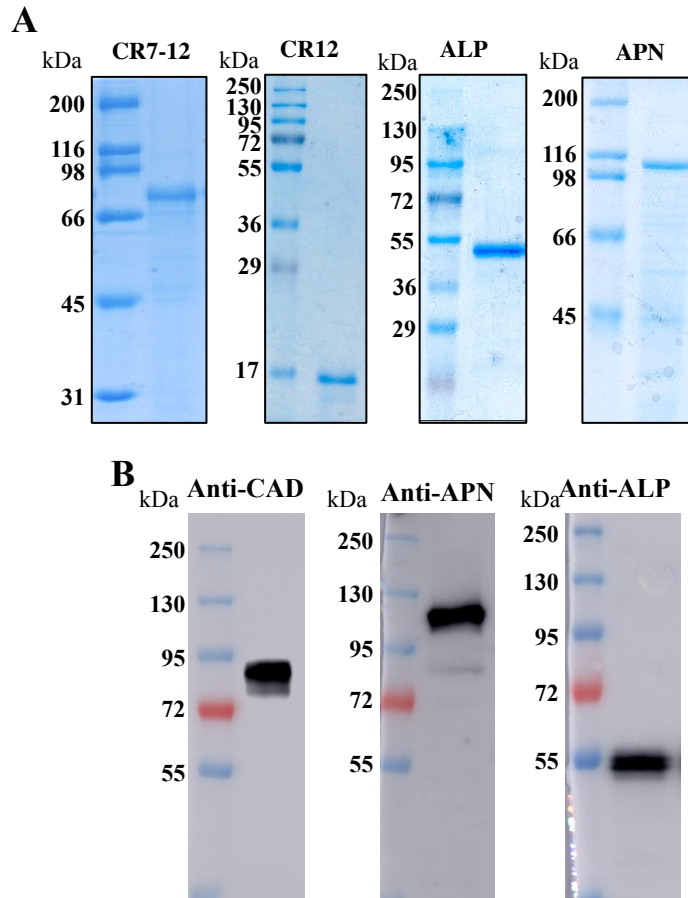

Supplement: supp_RA118.005101_139735_1_supp_227600_phh7ml.pdf [file supp_RA118.005101_139735_1_supp_227600_phh7ml.pdf]
